# Supplementary material for: 3-way Networks: Application of Hypergraphs for Modelling Increased Complexity in Comparative Genomics
Source: PubMed Central journal article supplement (PMC4376783; doi:10.1371/journal.pcbi.1004079), 2015-03-27
Supplement: pcbi.1004079.s001.pdf [file pcbi.1004079.s001.pdf]

NC\_000919  
NC\_002179  
NC\_002620  
NC\_002928  
NC\_002940  
NC\_002967  
NC\_002977  
NC\_003295  
NC\_003454  
NC\_003888  
NC\_004461  
NC\_004557  
NC\_004741  
NC\_005364  
NC\_005956  
NC\_006368  
NC\_007005  
NC\_007168  
NC\_007294  
NC\_007350  
NC\_007413  
NC\_007606  
NC\_007633  
NC\_008054  
NC\_008095  
NC\_008261  
NC\_008309  
NC\_008497  
NC\_008543  
NC\_008599  
NC\_008687  
NC\_008783  
NC\_008789  
NC\_009050  
NC\_009079  
NC\_009348  
NC\_009439  
NC\_009446  
NC\_009505  
NC\_009617  
NC\_009668  
NC\_009708  
NC\_009727  
NC\_009778  
NC\_009785  
NC\_009792  
NC\_009937  
NC\_010002  
NC\_010163  
NC\_010172  
NC\_010572  
NC\_010645  
NC\_010658  
NC\_010688  
NC\_010793  
NC\_010939  
NC\_011312  
NC\_011374

NC\_011420  
NC\_011837  
NC\_011896  
NC\_011898  
NC\_011916  
NC\_012026  
NC\_012039  
NC\_012468  
NC\_012472  
NC\_012779  
NC\_012803  
NC\_012850  
NC\_012857  
NC\_013446  
NC\_013511  
NC\_013716  
NC\_013853  
NC\_013928  
NC\_013948  
NC\_013949  
NC\_013961  
NC\_014029  
NC\_014033  
NC\_014034  
NC\_014121  
NC\_014370  
NC\_014393  
NC\_014623  
NC\_014659  
NC\_014752  
NC\_014810  
NC\_014920  
NC\_014921  
NC\_014965  
NC\_015291  
NC\_015381  
NC\_015571  
NC\_015663  
NC\_015726  
NC\_015964  
NC\_016027  
NC\_016445  
NC\_016603  
NC\_016629  
NC\_016775  
NC\_016776  
NC\_016778  
NC\_016795  
NC\_016802  
NC\_016803  
NC\_016804  
NC\_016822  
NC\_016829  
NC\_016845  
NC\_016915  
NC\_017066  
NC\_017138  
NC\_017171

NC\_017179  
NC\_017223  
NC\_017245  
NC\_017272  
NC\_017289  
NC\_017295  
NC\_017297  
NC\_017304  
NC\_017309  
NC\_017310  
NC\_017353  
NC\_017456  
NC\_017462  
NC\_017474  
NC\_017491  
NC\_017504  
NC\_017511  
NC\_017516  
NC\_017530  
NC\_017532  
NC\_017551  
NC\_017563  
NC\_017564  
NC\_017566  
NC\_017582  
NC\_017584  
NC\_017632  
NC\_017671  
NC\_017729  
NC\_017764  
NC\_017831  
NC\_017861  
NC\_017953  
NC\_018000  
NC\_018077  
NC\_018080  
NC\_018106  
NC\_018108  
NC\_018221  
NC\_018413  
NC\_018498  
NC\_018513  
NC\_018521  
NC\_018525  
NC\_018533  
NC\_018608  
NC\_018646  
NC\_018690  
NC\_018707  
NC\_019382  
NC\_019396  
NC\_019551  
NC\_019771  
NC\_019845  
NC\_019966  
NC\_019971  
NC\_020059  
NC\_020207

NC\_020211  
NC\_020238  
NC\_020418  
NC\_020450  
NC\_020507  
NC\_020508  
NC\_020526  
NC\_020800  
NC\_020992  
NC\_021150  
NC\_021151  
NC\_021181  
NC\_021200  
NC\_021214  
NC\_021224  
NC\_021235  
NC\_021237  
NC\_021290  
NC\_021352  
NC\_021521  
NC\_021742  
NC\_021744  
NC\_021807  
NC\_021824  
NC\_021831  
NC\_021872  
NC\_021881  
NC\_021883  
NC\_021905  
NC\_022000  
NC\_022048  
NC\_022244  
NC\_022245  
NC\_022246  
NC\_022347  
NC\_022349  
NC\_022350
