# Supplementary material for: 3-way Networks: Application of Hypergraphs for Modelling Increased Complexity in Comparative Genomics
Source: PubMed Central journal article supplement (PMC4376783; doi:10.1371/journal.pcbi.1004079), 2015-03-27
Supplement: pcbi.1004079.s002.pdf [file pcbi.1004079.s002.pdf]

Table S1: Measure of disagreement: Difference between the ratios of inbound over out-bound edges ( $D_o^i$ ), as well as the difference between the reciprocal ratios ( $D_i^o$ ) for each genus in the 2-way and 3-way best edge networks.

| Genus             | $D_o^i$ | $D_i^o$ |
|-------------------|---------|---------|
| Ochrobactrum      | 0       | 6       |
| Haemophilus       | 0       | 3       |
| Orientia          | 1       | 5       |
| Campylobacter     | 1       | 3       |
| Edwardsiella      | 1       | 1       |
| Cronobacter       | 2       | 4       |
| Coxiella          | 2       | 4       |
| Francisella       | 2       | 4       |
| Salmonella        | 2       | 4       |
| Micrococcus       | 2       | 4       |
| Methylobacterium  | 2       | 4       |
| Myxococcus        | 2       | 4       |
| Gluconacetobacter | 2       | 4       |
| Azorhizobium      | 2       | 4       |
| Pasteurella       | 2       | 4       |
| Erwinia           | 2       | 4       |
| Acholeplasma      | 2       | 4       |
| Ralstonia         | 2       | 4       |
| Thermus           | 2       | 4       |
| Vibrio            | 2       | 2       |
| Brucella          | 2       | 3       |
| Shigella          | 3       | 3       |
| Ureaplasma        | 3       | 3       |
| Delftia           | 3       | 3       |
| Listeria          | 3       | 3       |
| Mannheimia        | 3       | 3       |
| Methylococcus     | 3       | 3       |
| Prevotella        | 3       | 2       |
| Corynebacterium   | 4       | 2       |
| Yersinia          | 4       | 2       |
| Propionibacterium | 4       | 2       |
| Bacteroides       | 4       | 2       |
| Rhodococcus       | 4       | 2       |
| Stigmatella       | 4       | 2       |
| Shewanella        | 4       | 2       |
| Borrelia          | 4       | 2       |
| Paracoccus        | 4       | 2       |
| Halorhodospira    | 4       | 2       |
| Escherichia       | 4       | 2       |

|                  |    |    |
|------------------|----|----|
| Gardnerella      | 4  | 2  |
| Comamonas        | 4  | 2  |
| Lactococcus      | 4  | 2  |
| Chlamydophila    | 4  | 2  |
| Thermotoga       | 4  | 2  |
| Taylorella       | 4  | 2  |
| Stenotrophomonas | 4  | 2  |
| Azotobacter      | 4  | 2  |
| Dichelobacter    | 4  | 2  |
| Morganella       | 4  | 2  |
| Mycoplasma       | 4  | 4  |
| Aliivibrio       | 4  | 2  |
| Fusobacterium    | 4  | 2  |
| Gluconobacter    | 4  | 2  |
| Porphyromonas    | 4  | 2  |
| Caulobacter      | 4  | 2  |
| Cupriavidus      | 4  | 2  |
| Pectobacterium   | 4  | 2  |
| Legionella       | 4  | 2  |
| Leptospira       | 4  | 2  |
| Rickettsia       | 4  | 6  |
| Anaplasma        | 5  | 8  |
| Mycobacterium    | 5  | 5  |
| Bordetella       | 5  | 9  |
| Lactobacillus    | 5  | 4  |
| Citrobacter      | 5  | 57 |
| Neisseria        | 6  | 6  |
| Staphylococcus   | 6  | 1  |
| Burkholderia     | 6  | 5  |
| Proteus          | 6  | 0  |
| Streptomyces     | 7  | 7  |
| Acinetobacter    | 7  | 6  |
| Serratia         | 7  | 7  |
| Rhizobium        | 7  | 7  |
| Klebsiella       | 7  | 7  |
| Streptococcus    | 9  | 10 |
| Chlamydia        | 9  | 9  |
| Sinorhizobium    | 10 | 7  |
| Enterobacter     | 10 | 10 |
| Bacillus         | 10 | 6  |
| Pseudomonas      | 11 | 10 |
| Helicobacter     | 14 | 17 |
| Actinobacillus   | 14 | 13 |
| Xanthomonas      | 15 | 21 |

|                |    |    |
|----------------|----|----|
| Anabaena       | 15 | 61 |
| Desulfovibrio  | 15 | 16 |
| Aeromonas      | 19 | 17 |
| Clostridium    | 24 | 24 |
| Bartonella     | 26 | 26 |
| Treponema      | 34 | 28 |
| Enterococcus   | 43 | 24 |
| Rhodobacter    | 50 | 3  |
| Rhodospirillum | 50 | 4  |
